# Supplementary material for: Commissural neurons transgress the CNS/PNS boundary in absence of ventricular zone-derived netrin 1
Source: Oxford University Press journal article supplement (doi:10.1242/dev.159400), 2017-12-22
Supplement: dev159400supp.pdf [file dev159400supp.pdf]

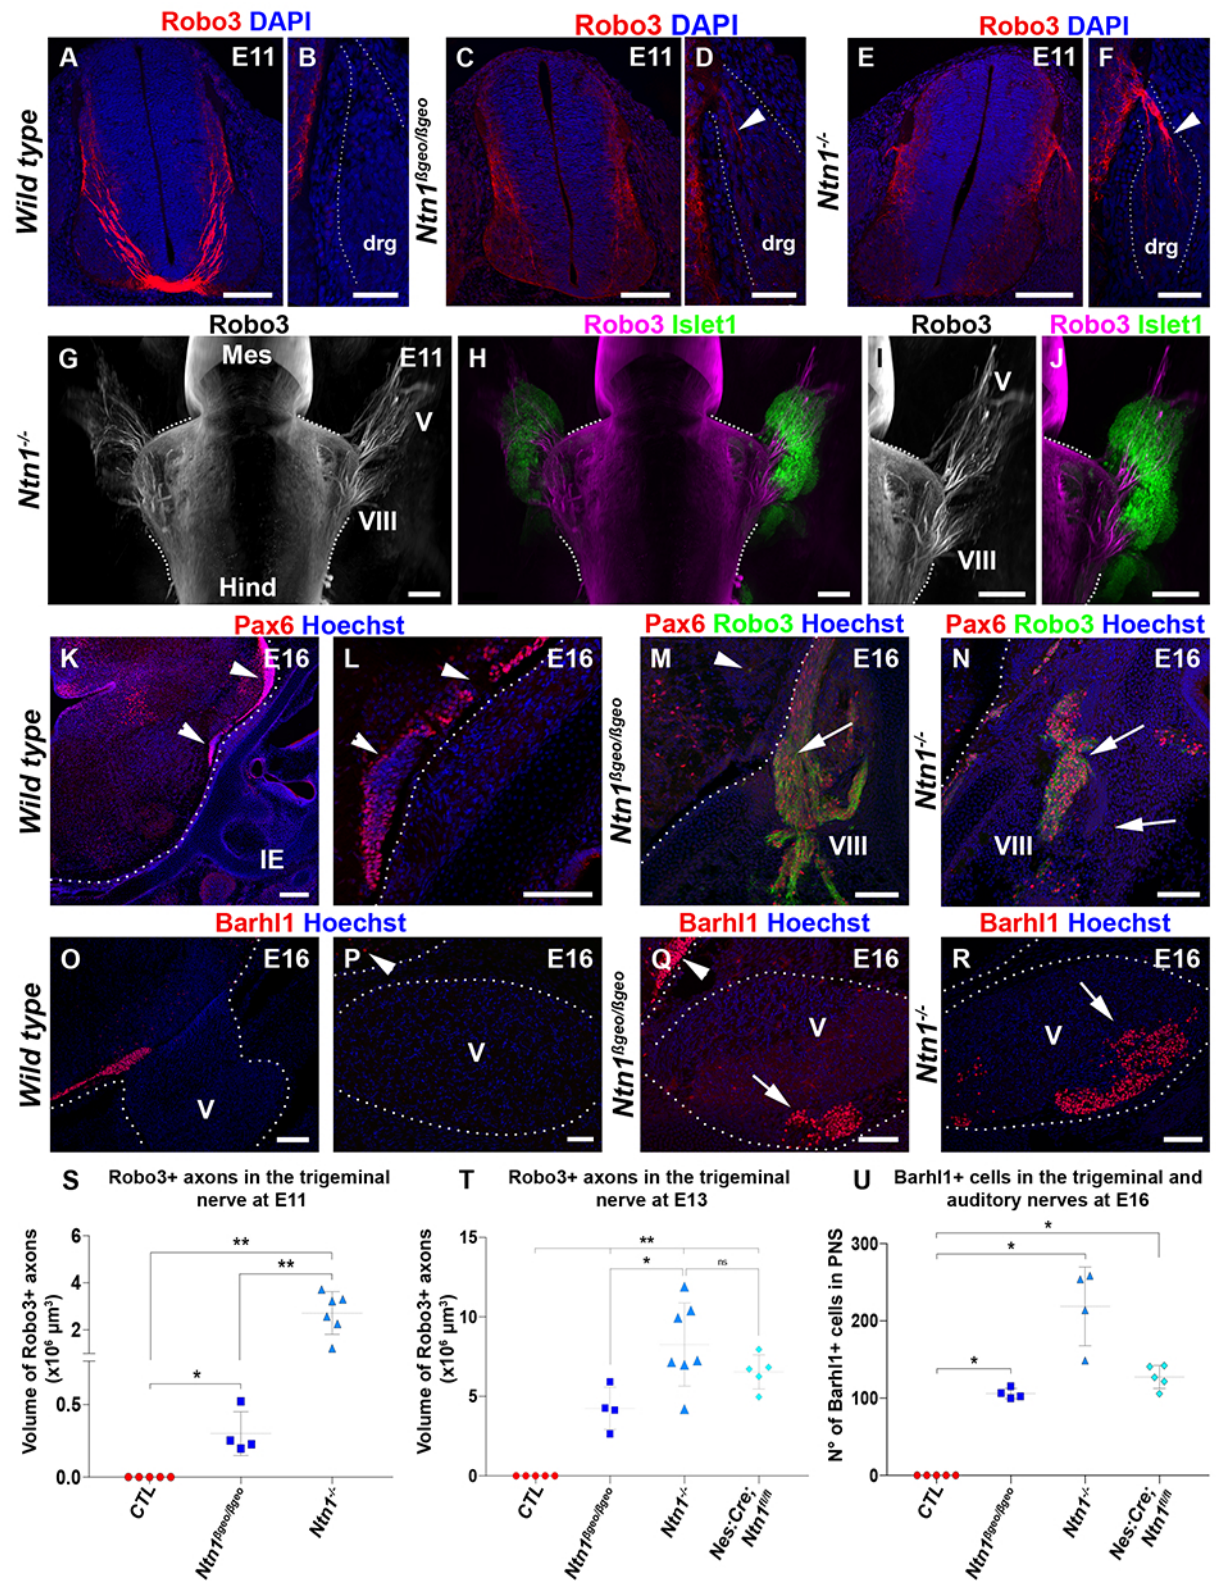

Figure S1

## Supplementary Figure 1

### Commissural axons exit the CNS by different nerve roots in absence of netrin-1

A-F, Coronal sections of E11 spinal cords immunolabelled for Robo3 and counterstained with DAPI. In wild type (A, B; n=3) Robo3 axons are only found in the CNS. In *Ntn1* <sup>$\beta$ geo/ $\beta$ geo</sup> (C, D; n=5) and *Ntn1*<sup>-/-</sup> (E, F; n=6) mutants, Robo3+ commissural axons invade the dorsal root ganglia (drg, arrowhead and dotted lines). G-J, LSM images of ventral views of *Ntn1*<sup>-/-</sup> E11 embryo illustrating the invasion of the trigeminal (V) and auditory (VIII) nerves and ganglia. Trigeminal neurons are immunolabelled for Islet1 (H, J, n=3). K-R, are coronal sections of the hindbrain of E16 embryos. In wild type, Pax6+ (K, L; n=5) and Barhl1+ (O, P; n=5) pontine neurons (arrowheads) migrate under the CNS/PNS boundary (dotted line). In *Ntn1* <sup>$\beta$ geo/ $\beta$ geo</sup> (M, Q; n=4) and *Ntn1*<sup>-/-</sup> (N, R; n=5) mutants, both Pax6 and Barhl1+ cells exit the brainstem and migrate in the PNS (arrows). They also express Robo3, confirming their commissural neuron identity (M, N). S, T, Quantification of the volume of Robo3+ axons invading the trigeminal nerve at E11 (S) and E13 (T) in *Ntn1* <sup>$\beta$ geo/ $\beta$ geo</sup>, *Ntn1*<sup>-/-</sup> and *Nes:Cre; Ntn1*<sup>fl/fl</sup> embryos (Table S1). U, Quantification of the number of Barhl1+ cells in the auditory and trigeminal nerve roots in *Ntn1* <sup>$\beta$ geo/ $\beta$ geo</sup>, *Ntn1*<sup>-/-</sup> and *Nes:Cre; Ntn1*<sup>fl/fl</sup> E16 cryosections (Table S2). Abbreviations: Mes, mesencephalon; Hind, hindbrain. Dotted lines delineate the CNS limit. Scale bars, 50  $\mu$ m (B, D, F), 100  $\mu$ m (A, C, E, K-R), 200  $\mu$ m (H, I, J).



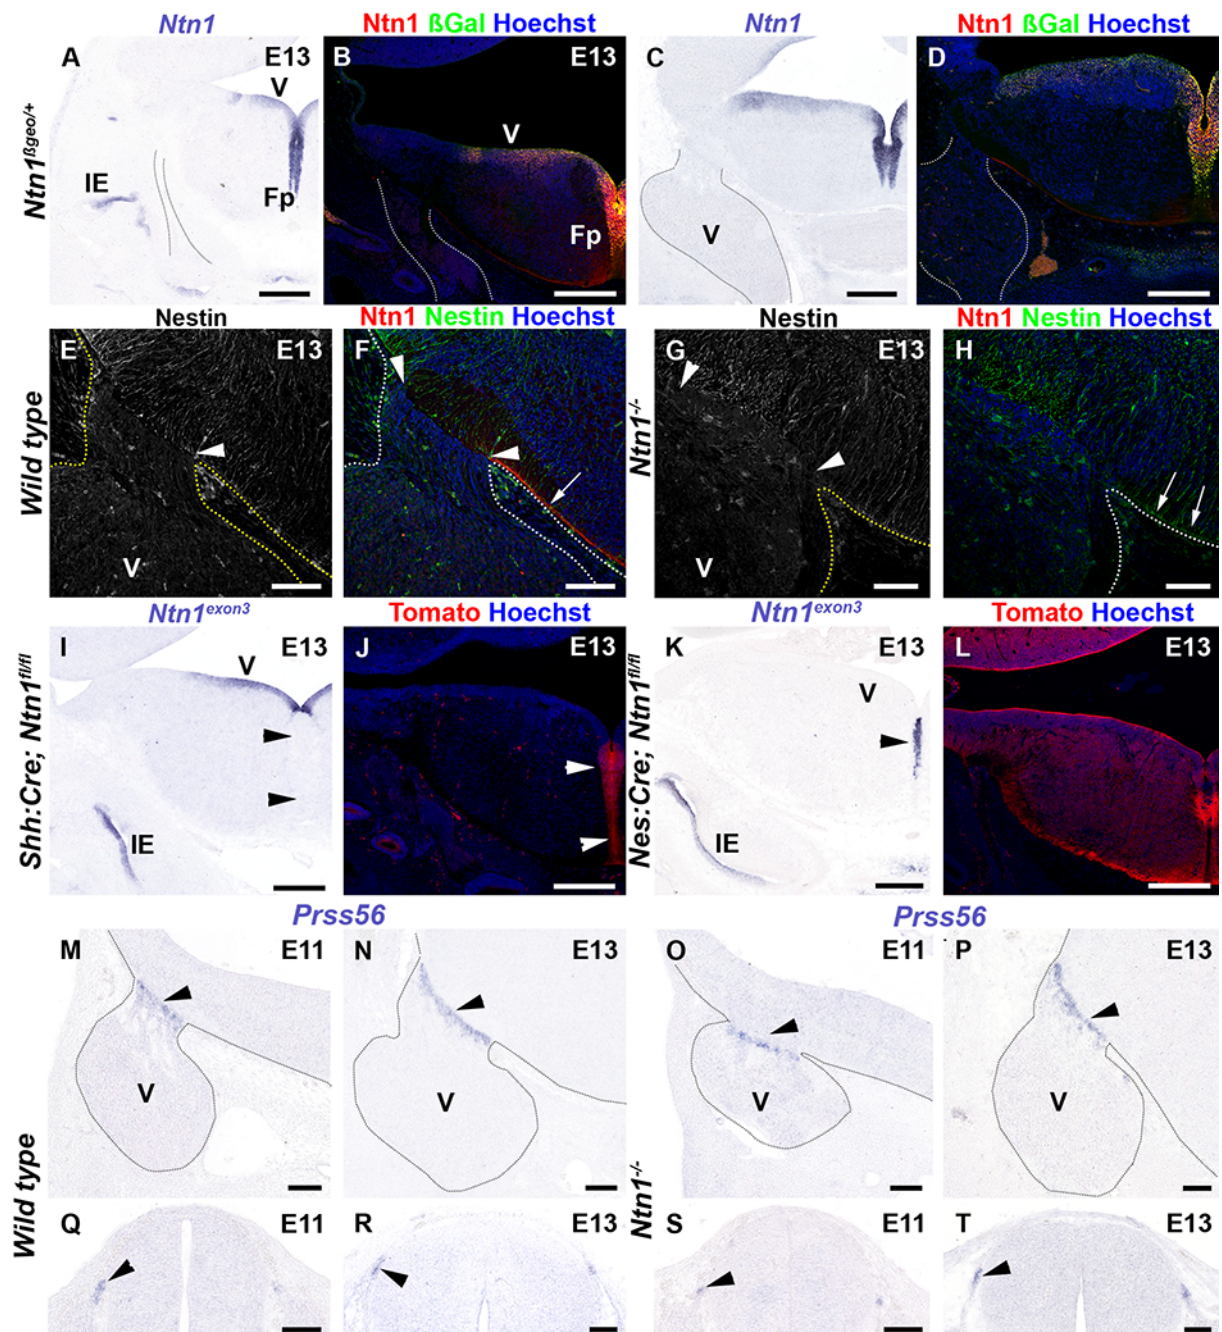

Figure S2

## Supplementary Figure 2

### Netrin-1 is not expressed at the level of hindbrain sensory roots.

Coronal sections at the level of the hindbrain (A-P) and spinal cord (Q-T).

A-D, In E13 *Ntn1* <sup>$\beta$ geo/+</sup> control embryo, *netrin-1* mRNA,  $\beta$ -galactosidase and netrin-1 immunoreactivity are found at the floor plate (Fp), ventricular zone (V) and the inner ear (IE). No netrin-1 is detected in nerves and ganglia (dotted lines, n=6). E-H, In E13 wild type embryos, the radial processes of Nestin+ ventricular zone progenitors extend to the pial surface at the level of the trigeminal nerve root (between arrowheads). Netrin-1 protein is found along the basal lamina (arrow in F, n=6) except at the trigeminal nerve root (arrowheads in F). In *Ntn1*<sup>-/-</sup> (G and H; n=6) mutants, Nestin+ fibers still reach the pial surface (arrowheads in G) even if netrin-1 protein is absent (arrows in H). I-J, In *Shh:Cre; Ntn1*<sup>fl/fl</sup> mutants, *netrin-1* mRNA is deleted from the floor plate (arrowheads in I; n=5) where tomato expression is induced by Cre recombinase (arrowheads in J; n=3). K-L, In *Nes:Cre;Ntn1*<sup>fl/fl</sup> mutants, *netrin-1* mRNA expression is ablated from the ventricular zone (v) and maintained in the floor plate (arrowhead in J; n=5) and the inner ear (IE). Tomato expression is induced throughout the CNS except the floor plate (L; n=3). M-T, In wild type E11 and E13 embryos, boundary cap cells express *Prss56* mRNA (arrowheads) at nerve roots in the hindbrain (M, N; n=3) and spinal cord (Q, R; n=3). This is also the case in *Ntn1*<sup>-/-</sup> mutants embryos (arrowheads in O, P, S, T; n=3). Abbreviation: IE, inner ear; V, trigeminal ganglion. Scale bars, 100  $\mu$ m (E, H, M-T), 250  $\mu$ m (A-D, I-L).

**Supplementary table 1****Volume of Robo3+ axons in the trigeminal ganglion at E11 and E13 in *Ntn1* mutants**

| Genotype (E11)                                                                                    | Number of cases      | Mean $\pm$ SD ( $\times 10^6 \mu\text{m}^3$ ) |
|---------------------------------------------------------------------------------------------------|----------------------|-----------------------------------------------|
| <i>CTL</i>                                                                                        | n = 5                | 0 $\pm$ 0                                     |
| <i>Ntn1</i> <sup><math>\beta\text{Geo}/\beta\text{Geo}</math></sup>                               | n = 4                | 0.3 $\pm$ 0.15                                |
| <i>Ntn1</i> <sup>-/-</sup>                                                                        | n = 6                | 2.72 $\pm$ 0.90                               |
| Genotype comparison                                                                               | Mann-Whitney test    | Kruskal-Wallis test                           |
| <i>CTL</i> vs <i>Ntn1</i> <sup><math>\beta\text{Geo}/\beta\text{Geo}</math></sup>                 | p-value = 0.008 (**) | p-value < 0.0001 (***)                        |
| <i>CTL</i> vs <i>Ntn1</i> <sup>-/-</sup>                                                          | p-value = 0.004 (**) |                                               |
| <i>Ntn1</i> <sup><math>\beta\text{Geo}/\beta\text{Geo}</math></sup> vs <i>Ntn1</i> <sup>-/-</sup> | p-value = 0.009 (**) |                                               |

| Genotype (E13)                                                                                               | Number of cases      | Mean $\pm$ SD ( $\times 10^6 \mu\text{m}^3$ ) |
|--------------------------------------------------------------------------------------------------------------|----------------------|-----------------------------------------------|
| <i>CTL</i>                                                                                                   | n = 5                | 0 $\pm$ 0                                     |
| <i>Ntn1</i> <sup><math>\beta\text{Geo}/\beta\text{Geo}</math></sup>                                          | n = 4                | 4.25 $\pm$ 1.33                               |
| <i>Ntn1</i> <sup>-/-</sup>                                                                                   | n = 7                | 8.26 $\pm$ 2.61                               |
| <i>Nes:Cre; Ntn1</i> <sup>fl/fl</sup>                                                                        | n = 5                | 6.55 $\pm$ 1.08                               |
| Genotype comparison                                                                                          | Mann-Whitney test    | Kruskal-Wallis test                           |
| <i>CTL</i> vs <i>Ntn1</i> <sup><math>\beta\text{Geo}/\beta\text{Geo}</math></sup>                            | p-value = 0.008 (**) | p-value = 0.0013 (**)                         |
| <i>CTL</i> vs <i>Ntn1</i> <sup>-/-</sup>                                                                     | p-value = 0.003 (**) |                                               |
| <i>CTL</i> vs <i>Nes:Cre; Ntn1</i> <sup>fl/fl</sup>                                                          | p-value = 0.008 (**) |                                               |
| <i>Ntn1</i> <sup><math>\beta\text{Geo}/\beta\text{Geo}</math></sup> vs <i>Ntn1</i> <sup>-/-</sup>            | p-value = 0.024 (*)  |                                               |
| <i>Ntn1</i> <sup><math>\beta\text{Geo}/\beta\text{Geo}</math></sup> vs <i>Nes:Cre; Ntn1</i> <sup>fl/fl</sup> | p-value = 0.032 (*)  |                                               |
| <i>Ntn1</i> <sup>-/-</sup> vs <i>Nes:Cre; Ntn1</i> <sup>fl/fl</sup>                                          | p-value = 0.149 (ns) |                                               |

**Supplementary table 2****Number of Barhl1+ cells in the auditory and trigeminal nerve roots at E16 in*****Ntn1* mutants**

| Genotype                                                                                                    | Number of cases      | Mean $\pm$ SD (n° cells) |
|-------------------------------------------------------------------------------------------------------------|----------------------|--------------------------|
| <i>CTL</i>                                                                                                  | n = 5                | 0 $\pm$ 0                |
| <i>Ntn1</i> <sup><math>\beta</math>Geo/<math>\beta</math>Geo</sup>                                          | n = 4                | 106.1 $\pm$ 6.77         |
| <i>Ntn1</i> <sup>-/-</sup>                                                                                  | n = 4                | 218.8 $\pm$ 50.82        |
| <i>Nes:Cre; Ntn1</i> <sup>fl/fl</sup>                                                                       | n = 5                | 127.4 $\pm$ 14.94        |
| Genotype comparison                                                                                         | Mann-Whitney test    | Kruskal-Wallis test      |
| <i>CTL</i> vs <i>Ntn1</i> <sup><math>\beta</math>Geo/<math>\beta</math>Geo</sup>                            | p-value = 0.008 (**) | p-value < 0.0001 (***)   |
| <i>CTL</i> vs <i>Ntn1</i> <sup>-/-</sup>                                                                    | p-value = 0.008 (**) |                          |
| <i>CTL</i> vs <i>Nes:Cre; Ntn1</i> <sup>fl/fl</sup>                                                         | p-value = 0.008 (**) |                          |
| <i>Ntn1</i> <sup><math>\beta</math>Geo/<math>\beta</math>Geo</sup> vs <i>Ntn1</i> <sup>-/-</sup>            | p-value = 0.029 (*)  |                          |
| <i>Ntn1</i> <sup><math>\beta</math>Geo/<math>\beta</math>Geo</sup> vs <i>Nes:Cre; Ntn1</i> <sup>fl/fl</sup> | p-value = 0.064 (ns) |                          |
| <i>Ntn1</i> <sup>-/-</sup> vs <i>Nes:Cre; Ntn1</i> <sup>fl/fl</sup>                                         | p-value = 0.016 (*)  |                          |

**Supplementary table 3****Volume of Robo3+ axons in the trigeminal ganglion at E11 and E13 in *Dcc* KO**

| Genotype (E11)                          | Number of cases     | Mean $\pm$ SD (n° cells) |
|-----------------------------------------|---------------------|--------------------------|
| <i>CTL</i>                              | n = 4               | 0 $\pm$ 0                |
| <i>Dcc</i> <sup>-/-</sup>               | n = 4               | 1.078 $\pm$ 1.24         |
| Genotype comparison                     | Mann-Whitney test   | Kruskal-Wallis test      |
| <i>CTL</i> vs <i>Dcc</i> <sup>-/-</sup> | p-value = 0.029 (*) | Not necessary            |

| Genotype (E13)                          | Number of cases     | Mean $\pm$ SD (n° cells) |
|-----------------------------------------|---------------------|--------------------------|
| <i>CTL</i>                              | n = 4               | 0 $\pm$ 0                |
| <i>Dcc</i> <sup>-/-</sup>               | n = 4               | 5.258 $\pm$ 2.054        |
| Genotype comparison                     | Mann-Whitney test   | Kruskal-Wallis test      |
| <i>CTL</i> vs <i>Dcc</i> <sup>-/-</sup> | p-value = 0.029 (*) | Not necessary            |

**Supplementary table 4**

**Number of Barhl1+ cells in the auditory and trigeminal nerve roots at E16 in Dcc mutants**

| Genotype                                                           | Number of cases      | Mean $\pm$ SD (n° cells) |
|--------------------------------------------------------------------|----------------------|--------------------------|
| <i>CTL</i>                                                         | n = 5                | 0 $\pm$ 0                |
| <i>Dcc</i> <sup>-/-</sup>                                          | n = 5                | 146 $\pm$ 36.83          |
| <i>Wnt1:Cre; Dcc</i> <sup>fl/fl</sup>                              | n = 4                | 28.3 $\pm$ 9.25          |
| Genotype comparison                                                | Mann-Whitney test    | Kruskal-Wallis test      |
| <i>CTL</i> vs <i>Dcc</i> <sup>-/-</sup>                            | p-value = 0.008 (**) | p-value < 0.0001 (***)   |
| <i>CTL</i> vs <i>Wnt1:Cre; Dcc</i> <sup>fl/fl</sup>                | p-value = 0.008 (**) |                          |
| <i>Dcc</i> <sup>-/-</sup> vs <i>Wnt1:Cre; Dcc</i> <sup>fl/fl</sup> | p-value = 0.016 (*)  |                          |

## Movies

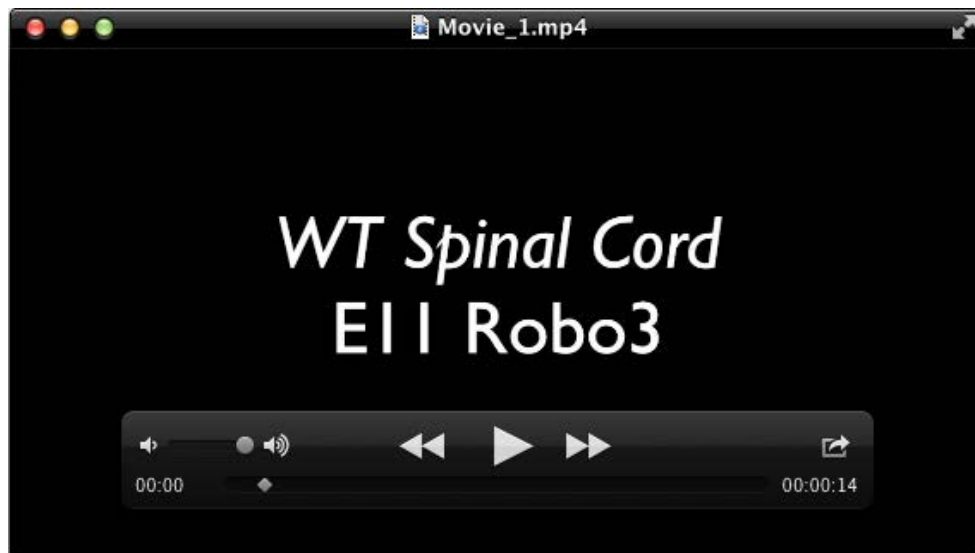

### Movie 1

3D movie of 3DISCO-cleared spinal cord from an E11 wild type embryo showing the restriction of Robo3-immunoreactive commissural axons to the CNS.



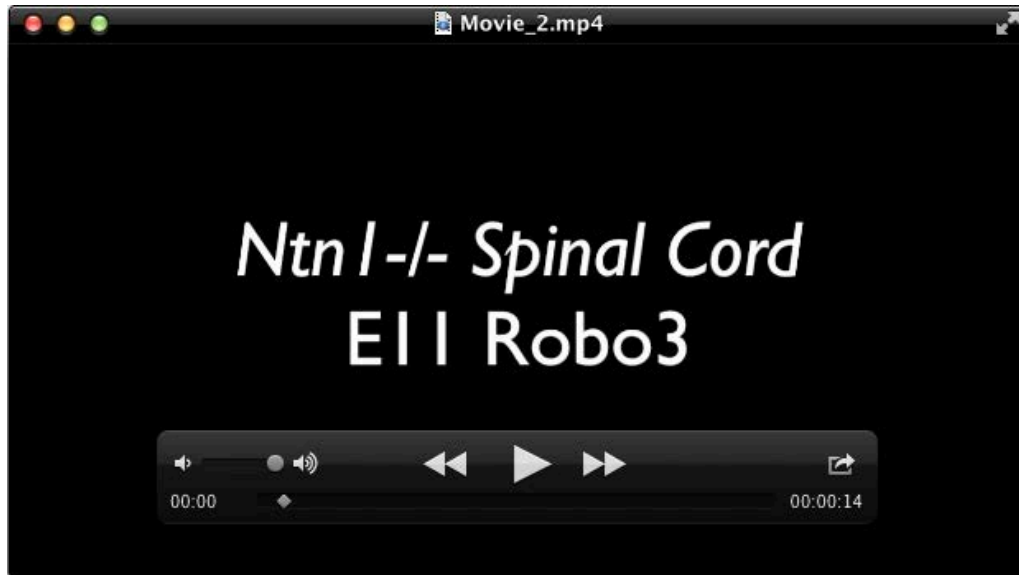

## Movie 2

3D movie of 3DISCO-cleared spinal cord from an E11 *Ntn1*<sup>-/-</sup> embryo showing the invasion of dorsal root ganglia (Drg) by a subset of Robo3-immunoreactive commissural axons.

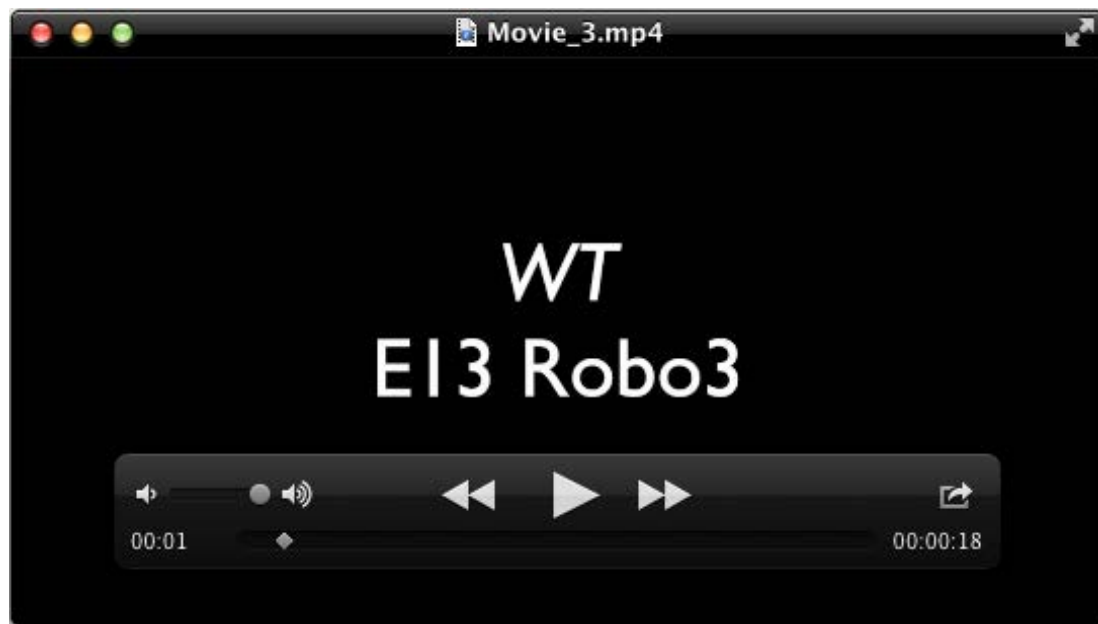

### Movie 3

3D movie of 3DISCO-cleared E13 wild type embryo. All Robo3+ axons are confined to the CNS. Abbreviations: Ce, cerebellum; Hind, hindbrain; Mes, mesencephalon; Fr; Fasciculus retroflexus.

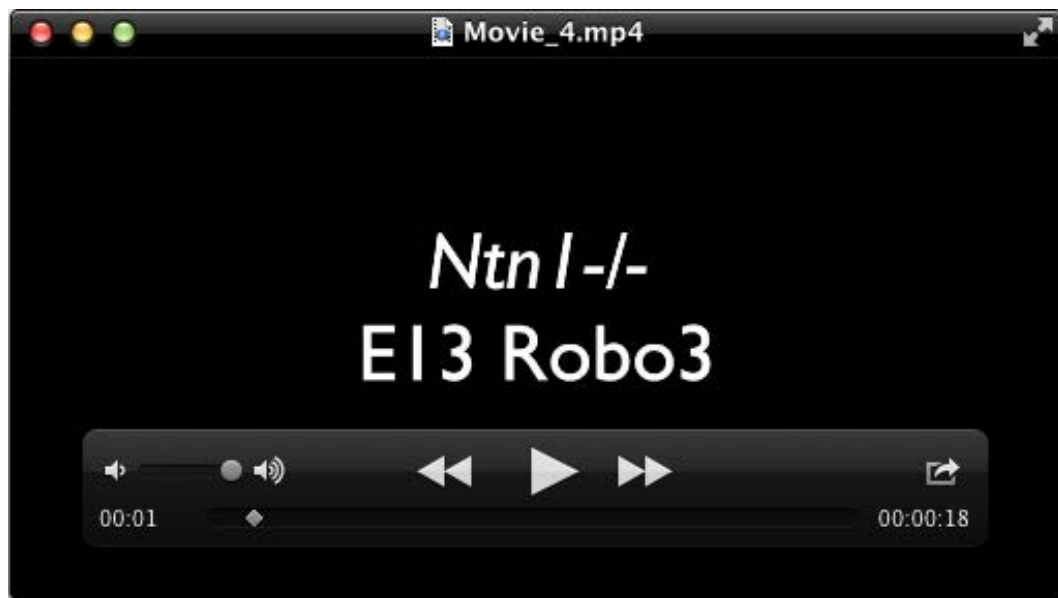

#### Movie 4

3D movie of 3DISCO-cleared hindbrain from an E13 *Ntn1*<sup>-/-</sup> embryo showing the massive invasion of trigeminal and auditory nerves by Robo3-immunoreactive commissural axons. Abbreviations: Ce, cerebellum; Hind, hindbrain; Mes, mesencephalon; Fr; Fasciculus retroflexus; V, trigeminal nerve; VIII, auditory nerve.

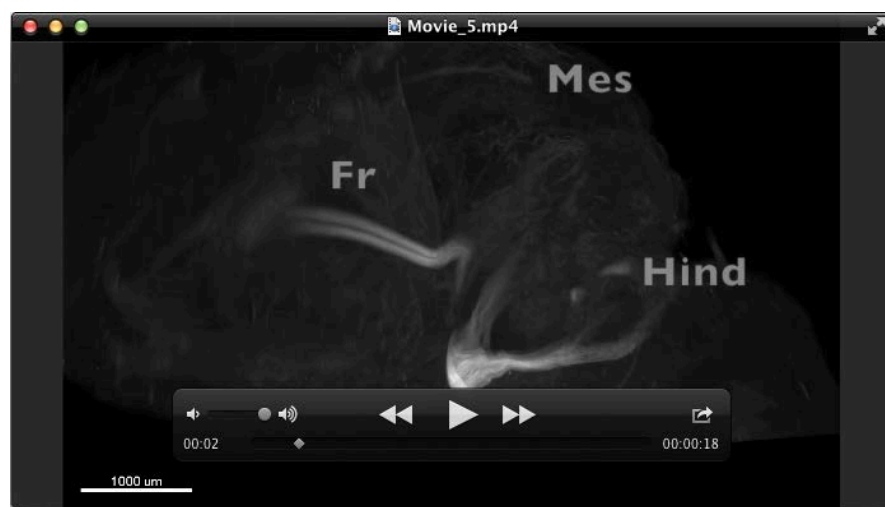

### Movie 5

3D movie of the migrating stream of Robo3-immuoreactive pontine neurons in a wild type E16 embryo. Abbreviations: Hind, hindbrain; Mes, mesencephalon; Fr; Fasciculus retroflexus;

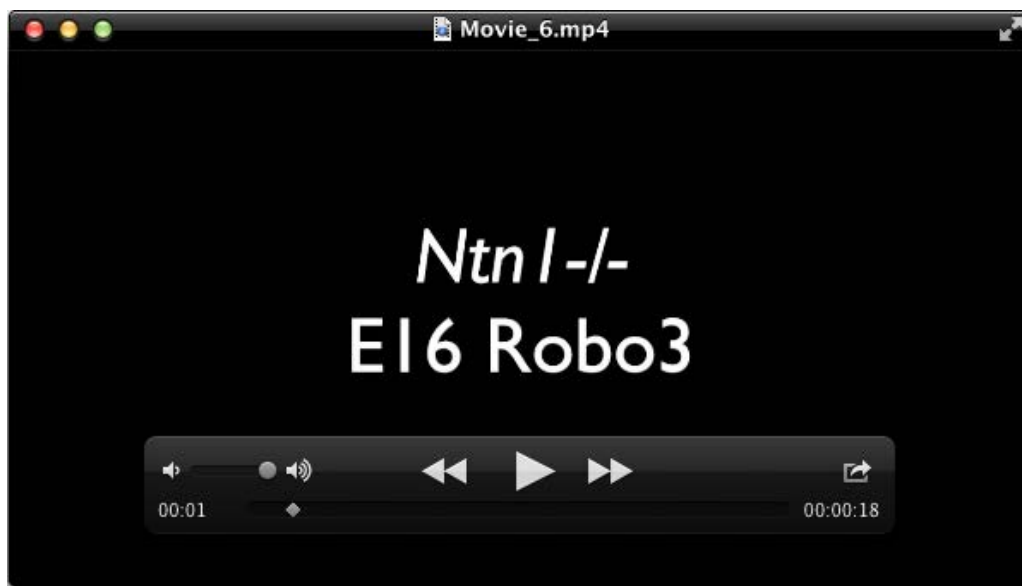

### Movie 6

3D movie of the migrating stream of Robo3-immuoreactive pontine neurons in a *Ntn1*<sup>-/-</sup> E16 embryo. Robo3 pontine neurons fail to reach the midline and a large fraction migrate outside the CNS in to the trigeminal and auditory nerves.

Abbreviations: Hind, hindbrain; Mes, mesencephalon; Fr; Fasciculus retroflexus; V, trigeminal nerve; VIII, auditory nerve.



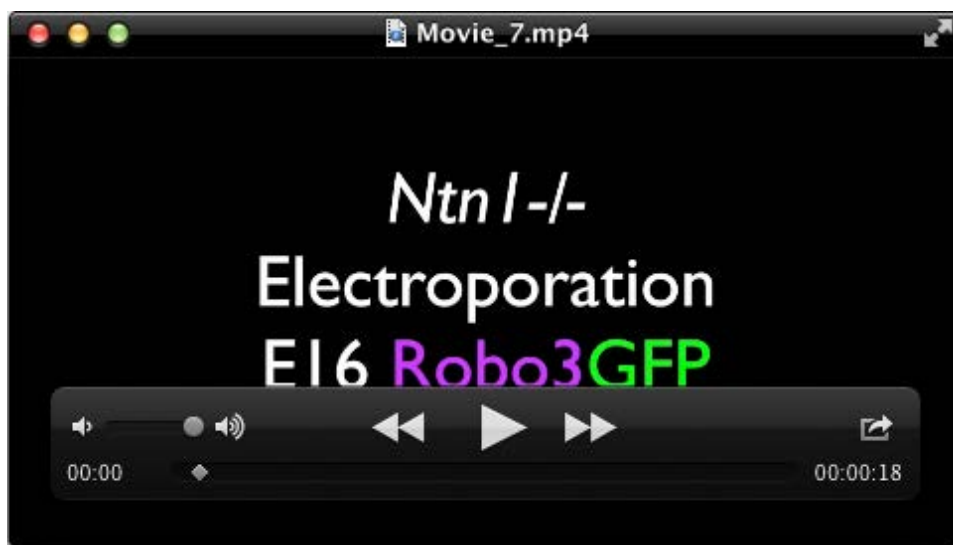

### Movie 7

3D Movies of an E16 *Ntn1*<sup>-/-</sup> embryo electroporated unilaterally with GFP at E13. Whole-mount immunolabeling for Barhl1 (Green) and Robo3 (Magenta) and 3DISCO clearing. GFP+/Barhl1+ pontine neurons invade the PNS. Abbreviations: Hind, hindbrain; Mes, mesencephalon; Fr, Fasciculus retroflexus; V, trigeminal nerve; VIII, auditory nerve.
